# Supplementary material
Source: publisher site journal article supplement (https://www.dovepress.com/article/supplementary_file/536920/536920%20Supplementary%20materials.docx)
Supplement: Supplementary file 1 [file 536920%20Supplementary%20materials.docx]

**Supplementary Information**

**Design, synthesis and antiproliferative activity studies of novel 1,2,3-triazole-urea hybrids**

En Gao1,2*, Haoying Zhang1, Yajie Guo3, Xi Wang1, Longfei Mao4, Lizeng Peng5*, Guiqing Xu1, Xiaojun Yao2, Shouhu Li6, Huibao Long3, Tong Wang3, Haidong Wu3

1School of Chemistry and Chemical Engineering, Henan Normal University, Xinxiang, 453000, China

2State Key Laboratory of Quality Research in Chinese Medicine/Macau Institute for Applied Research in Medicine and Health, Macau University of Science and Technology, Macau, China

3Department of Emergency, The Eighth Affiliated Hospital, Sun Yat-Sen University, Shenzhen 518033, China

4College of Basic Medicine and Forensic Medicine, Henan University of Science and Technology, 263 Kaiyuan Road, Luoyang 471003, China

5Institute of Agro-Food Science and Technology, Key Laboratory of Agro. Products Processing Technology of Shandong Province, Key Laboratory of Novel Food Resources Processing Ministry of Agriculture, Shandong Academy of Agricultural Sciences, Jinan 250100, China

6School of Pharmacy, Xinxiang University, Xinxiang, Henan 453000, China

*Corresponding authors:

**En Gao**, School of Chemistry and Chemical Engineering, Henan Normal University, Xinxiang, 453000, China. E-mail: [ge_163@126.com](mailto:ge_163@126.com)

**Lizeng Peng**,Shandong Academy of Agricultural Sciences, 202 Gongye North Road, Licheng District, Jinan City, 250000, China. E-mail: penglizeng@sdnu.edu.cn

**Table of Content**

[Figure S1-1. 1H NMR spectrum (400MHz, DMSO-*d*6) of compound 2a 1](#_Toc202199515)

[Figure S1-2. 13C NMR spectrum (100MHz, DMSO-*d*6) of compound 2a 1](#_Toc202199516)

[Figure S2-1. 1H NMR spectrum (400MHz, DMSO-*d*6) of compound 2b 2](#_Toc202199517)

[Figure S2-2. 13C NMR spectrum (100MHz, DMSO-*d*6) of compound 2b 2](#_Toc202199518)

[Figure S3-1. 1H NMR spectrum (400MHz, DMSO-*d*6) of compound 4a 3](#_Toc202199519)

[Figure S3-2. 13C NMR spectrum (100MHz, DMSO-*d*6) of compound 4a 3](#_Toc202199520)

[Figure S4-1. 1H NMR spectrum (400MHz, DMSO-*d*6) of compound 4b 4](#_Toc202199521)

[Figure S4-2. 13C NMR spectrum (100MHz, DMSO-*d*6) of compound 4b 4](#_Toc202199522)

[Figure S5-1. 1H NMR spectrum (400MHz, DMSO-*d*6) of compound 6a 5](#_Toc202199523)

[Figure S5-2. 13C NMR spectrum (100MHz, DMSO-*d*6) of compound 6a 5](#_Toc202199524)

[Figure S6-1. 1H NMR spectrum (400MHz, DMSO-*d*6) of compound 6b 6](#_Toc202199525)

[Figure S6-2. 13C NMR spectrum (100MHz, DMSO-*d*6) of compound 6b 6](#_Toc202199526)

[Figure S7-1. 1H NMR spectrum (400MHz, DMSO-*d*6) of compound 3a 7](#_Toc202199527)

[Figure S7-2. 13C NMR spectrum (100MHz, DMSO-*d*6) of compound 3a 7](#_Toc202199528)

[Figure S8-1. 1H NMR spectrum (400MHz, DMSO-*d*6) of compound 3b 8](#_Toc202199529)

[Figure S8-2. 13C NMR spectrum (100MHz, DMSO-*d*6) of compound 3b 8](#_Toc202199530)

[Figure S9-1. 1H NMR spectrum (400MHz, DMSO-*d*6) of compound 3c 9](#_Toc202199531)

[Figure S9-2. 13C NMR spectrum (100MHz, DMSO-*d*6) of compound 3c 9](#_Toc202199532)

[Figure S10-1. 1H NMR spectrum (400MHz, DMSO-*d*6) of compound 3d 10](#_Toc202199533)

[Figure S10-2. 13C NMR spectrum (100MHz, DMSO-*d*6) of compound 3d 10](#_Toc202199534)

[Figure S11-1. 1H NMR spectrum (400MHz, DMSO-*d*6) of compound 3e 11](#_Toc202199535)

[Figure S11-2. 13C NMR spectrum (100MHz, DMSO-*d*6) of compound 3e 11](#_Toc202199536)

[Figure S12-1. 1H NMR spectrum (400MHz, DMSO-*d*6) of compound 5a 12](#_Toc202199537)

[Figure S12-2. 13C NMR spectrum (100MHz, DMSO-*d*6) of compound 5a 12](#_Toc202199538)

[Figure S13-1. 1H NMR spectrum (400MHz, DMSO-*d*6) of compound 5b 13](#_Toc202199539)

[Figure S13-2. 13C NMR spectrum (100MHz, DMSO-*d*6) of compound 5b 13](#_Toc202199540)

[Figure S14-1. 1H NMR spectrum (400MHz, DMSO-*d*6) of compound 5c 14](#_Toc202199541)

[Figure S14-2. 13C NMR spectrum (100MHz, DMSO-*d*6) of compound 5c 14](#_Toc202199542)

[Figure S15-1. 1H NMR spectrum (400MHz, DMSO-*d*6) of compound 5d 15](#_Toc202199543)

[Figure S15-2. 13C NMR spectrum (100MHz, DMSO-*d*6) of compound 5d 15](#_Toc202199544)

[Figure S16-1. 1H NMR spectrum (400MHz, DMSO-*d*6) of compound 5e 16](#_Toc202199545)

[Figure S16-2. 13C NMR spectrum (100MHz, DMSO-*d*6) of compound 5e 16](#_Toc202199546)

[Figure S17-1. 1H NMR spectrum (400MHz, DMSO-*d*6) of compound 7a 17](#_Toc202199547)

[Figure S17-2. 13C NMR spectrum (100MHz, DMSO-*d*6) of compound 7a 17](#_Toc202199548)

[Figure S18-1. 1H NMR spectrum (400MHz, DMSO-*d*6) of compound 7b 18](#_Toc202199549)

[Figure S18-2. 13C NMR spectrum (100MHz, DMSO-*d*6) of compound 7b 18](#_Toc202199550)

[Figure S19-1. 1H NMR spectrum (400MHz, DMSO-*d*6) of compound 7c 19](#_Toc202199551)

[Figure S19-2. 13C NMR spectrum (100MHz, DMSO-*d*6) of compound 7c 19](#_Toc202199552)

[Figure S20-1. 1H NMR spectrum (400MHz, DMSO-*d*6) of compound 7d 20](#_Toc202199553)

[Figure S20-2. 13C NMR spectrum (100MHz, DMSO-*d*6) of compound 7d 20](#_Toc202199554)

[Figure S21-1. 1H NMR spectrum (400MHz, DMSO-*d*6) of compound 7e 21](#_Toc202199555)

[Figure S21-2. 13C NMR spectrum (100MHz, DMSO-*d*6) of compound 7e 21](#_Toc202199556)

# Figure S1-1. 1H NMR spectrum (400MHz, DMSO-*d*6) of compound 2a

# Figure S1-2. 13C NMR spectrum (100MHz, DMSO-*d*6) of compound 2a

# Figure S2-1. 1H NMR spectrum (400MHz, DMSO-*d*6) of compound 2b

# Figure S2-2. 13C NMR spectrum (100MHz, DMSO-*d*6) of compound 2b

# Figure S3-1. 1H NMR spectrum (400MHz, DMSO-*d*6) of compound 4a

# Figure S3-2. 13C NMR spectrum (100MHz, DMSO-*d*6) of compound 4a

# Figure S4-1. 1H NMR spectrum (400MHz, DMSO-*d*6) of compound 4b

# Figure S4-2. 13C NMR spectrum (100MHz, DMSO-*d*6) of compound 4b

# Figure S5-1. 1H NMR spectrum (400MHz, DMSO-*d*6) of compound 6a

# Figure S5-2. 13C NMR spectrum (100MHz, DMSO-*d*6) of compound 6a

# Figure S6-1. 1H NMR spectrum (400MHz, DMSO-*d*6) of compound 6b

# Figure S6-2. 13C NMR spectrum (100MHz, DMSO-*d*6) of compound 6b

# Figure S7-1. 1H NMR spectrum (400MHz, DMSO-*d*6) of compound 3a

# Figure S7-2. 13C NMR spectrum (100MHz, DMSO-*d*6) of compound 3a

# Figure S8-1. 1H NMR spectrum (400MHz, DMSO-*d*6) of compound 3b

# Figure S8-2. 13C NMR spectrum (100MHz, DMSO-*d*6) of compound 3b

# Figure S9-1. 1H NMR spectrum (400MHz, DMSO-*d*6) of compound 3c

# Figure S9-2. 13C NMR spectrum (100MHz, DMSO-*d*6) of compound 3c

# Figure S10-1. 1H NMR spectrum (400MHz, DMSO-*d*6) of compound 3d

# Figure S10-2. 13C NMR spectrum (100MHz, DMSO-*d*6) of compound 3d

# Figure S11-1. 1H NMR spectrum (400MHz, DMSO-*d*6) of compound 3e

# Figure S11-2. 13C NMR spectrum (100MHz, DMSO-*d*6) of compound 3e

# Figure S12-1. 1H NMR spectrum (400MHz, DMSO-*d*6) of compound 5a

# Figure S12-2. 13C NMR spectrum (100MHz, DMSO-*d*6) of compound 5a

# Figure S13-1. 1H NMR spectrum (400MHz, DMSO-*d*6) of compound 5b

# Figure S13-2. 13C NMR spectrum (100MHz, DMSO-*d*6) of compound 5b

# Figure S14-1. 1H NMR spectrum (400MHz, DMSO-*d*6) of compound 5c

# Figure S14-2. 13C NMR spectrum (100MHz, DMSO-*d*6) of compound 5c

# Figure S15-1. 1H NMR spectrum (400MHz, DMSO-*d*6) of compound 5d

# Figure S15-2. 13C NMR spectrum (100MHz, DMSO-*d*6) of compound 5d

# Figure S16-1. 1H NMR spectrum (400MHz, DMSO-*d*6) of compound 5e

# Figure S16-2. 13C NMR spectrum (100MHz, DMSO-*d*6) of compound 5e

# Figure S17-1. 1H NMR spectrum (400MHz, DMSO-*d*6) of compound 7a

# Figure S17-2. 13C NMR spectrum (100MHz, DMSO-*d*6) of compound 7a

# Figure S18-1. 1H NMR spectrum (400MHz, DMSO-*d*6) of compound 7b

# Figure S18-2. 13C NMR spectrum (100MHz, DMSO-*d*6) of compound 7b

# Figure S19-1. 1H NMR spectrum (400MHz, DMSO-*d*6) of compound 7c

# Figure S19-2. 13C NMR spectrum (100MHz, DMSO-*d*6) of compound 7c

# Figure S20-1. 1H NMR spectrum (400MHz, DMSO-*d*6) of compound 7d

# Figure S20-2. 13C NMR spectrum (100MHz, DMSO-*d*6) of compound 7d

# Figure S21-1. 1H NMR spectrum (400MHz, DMSO-*d*6) of compound 7e

# Figure S21-2. 13C NMR spectrum (100MHz, DMSO-*d*6) of compound 7e
